# Supplementary material for: Inoculation with Biofilm of Bacillus subtilis Promotes the Growth of Lactuca sativa
Source: MDPI journal article supplement (doi:10.3390/su152115406), 2023-10-29
Supplement: s1 [file s1]

Archive with 1 entries (1 files):
- sustainability-2583091-supplementary.pdf
