# Supplementary figures and images for: Inoculation with Biofilm of Bacillus subtilis Promotes the Growth of Lactuca sativa
Source: MDPI journal article supplement (doi:10.3390/su152115406), 2023-10-29

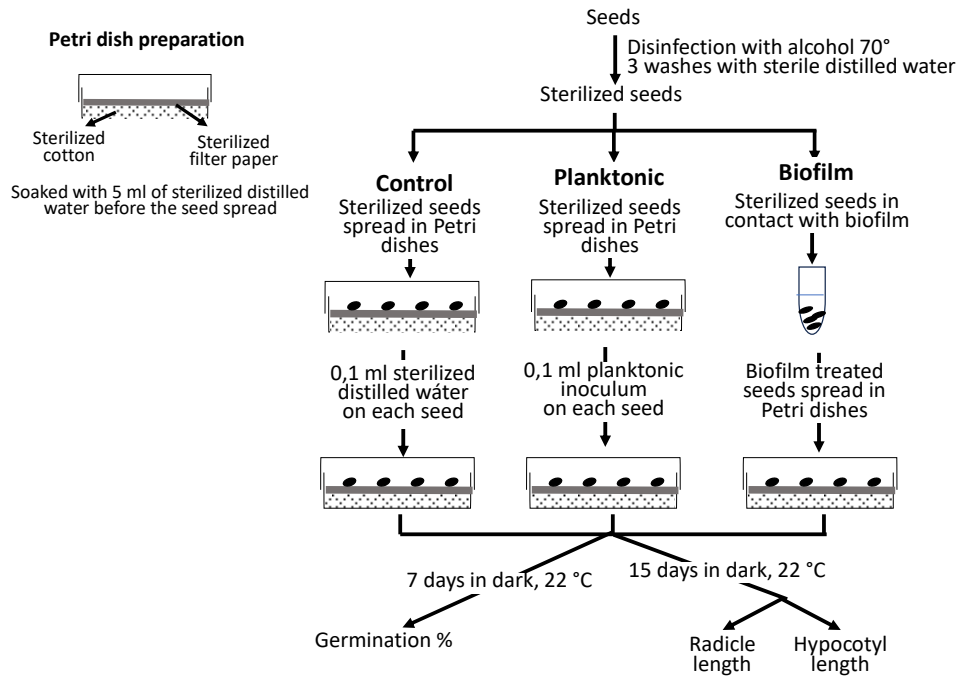

**Figure S1.** Scheme of the seed germination assays.

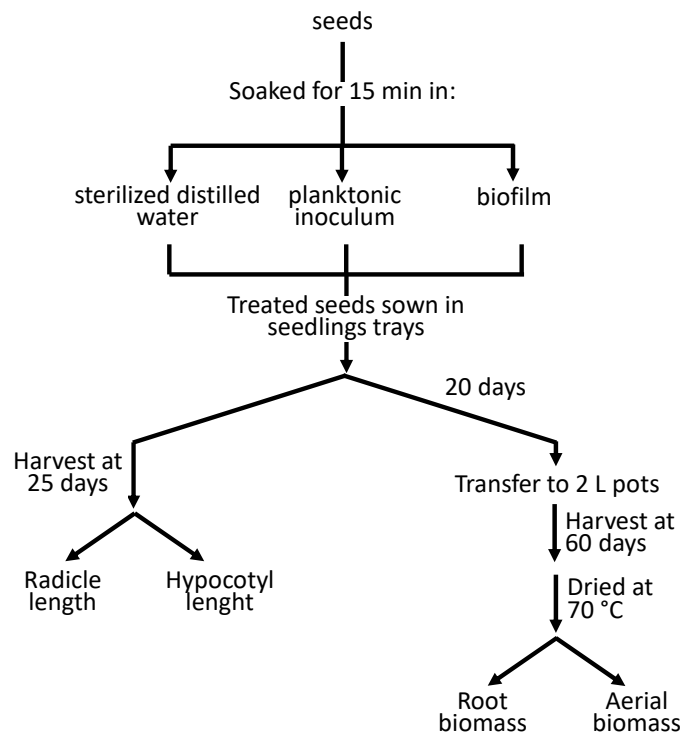

**Figure S2.** Scheme of the greenhouse assays.

Supplement: s1 [file s1 › sustainability-2583091-supplementary.pdf]
